# Supplementary material for: Microwave spectroscopy and structures of two conformers of 1H-heptafluoropropane
Source: Royal Society of Chemistry journal article supplement (doi:10.1039/c000524j), 2010-01-01
Supplement: c000524j.pdf [file c000524j.pdf]

Supplementary Table 1. Observed and assigned transitions for the gauche and trans conformers of 1H-heptafluoropropane.

| J'      | K <sub>p</sub> ' | K <sub>o</sub> ' | ← | J'' | K <sub>p</sub> '' | K <sub>o</sub> '' | Gauche<br>Freq/MHz | Gauche<br>(Obs-<br>Calc)/kHz | Trans<br>Freq/MHz | Trans<br>(Obs-<br>Calc)/kHz |
|---------|------------------|------------------|---|-----|-------------------|-------------------|--------------------|------------------------------|-------------------|-----------------------------|
| a-types |                  |                  |   |     |                   |                   |                    |                              |                   |                             |
| 4       | 0                | 4                |   | 3   | 0                 | 3                 | 8271.8813          | 0.4                          | 9257.7763         | -0.1                        |
| 5       | 0                | 5                |   | 4   | 0                 | 4                 | 10257.4942         | -3.6                         | 11553.0458        | -0.8                        |
| 6       | 0                | 6                |   | 5   | 0                 | 5                 | 12219.2199         | 0.4                          |                   |                             |
| 7       | 0                | 7                |   | 6   | 0                 | 6                 | 14171.5208         | 0.4                          |                   |                             |
| 4       | 1                | 3                |   | 3   | 1                 | 2                 |                    |                              | 9374.1207         | -0.5                        |
| 5       | 1                | 4                |   | 4   | 1                 | 3                 |                    |                              | 11711.5802        | -0.3                        |
| 4       | 1                | 4                |   | 3   | 1                 | 3                 | 8109.8122          | 0.1                          |                   |                             |
| 5       | 1                | 5                |   | 4   | 1                 | 4                 | 10115.4563         | 0.0                          |                   |                             |
| 6       | 1                | 6                |   | 5   | 1                 | 5                 | 12110.9545         | 0.9                          |                   |                             |
| 7       | 1                | 7                |   | 6   | 1                 | 6                 | 14097.5409         | -0.1                         |                   |                             |
| 4       | 2                | 2                |   | 3   | 2                 | 1                 |                    |                              | 9311.0208         | 0.7                         |
| 5       | 2                | 3                |   | 4   | 2                 | 2                 |                    |                              | 11654.3509        | 0.4                         |
| 4       | 2                | 3                |   | 3   | 2                 | 1                 |                    |                              | 9283.2838         | 0.5                         |
| 5       | 2                | 4                |   | 4   | 2                 | 3                 |                    |                              | 11600.5447        | 0.0                         |
| 4       | 3                | 2                |   | 3   | 3                 | 1                 |                    |                              | 9290.8261         | 0.3                         |
| 5       | 3                | 3                |   | 4   | 3                 | 2                 |                    |                              | 11615.4784        | -0.3                        |
| 3       | 2                | 1                |   | 2   | 0                 | 2                 |                    |                              | 9348.2797         | -2.6                        |
| 4       | 2                | 2                |   | 3   | 0                 | 3                 |                    |                              | 11706.4242        | 1.1                         |
| b-types |                  |                  |   |     |                   |                   |                    |                              |                   |                             |
| 4       | 1                | 4                |   | 3   | 0                 | 3                 |                    |                              | 9647.7934         | 1.1                         |
| 5       | 1                | 5                |   | 4   | 0                 | 4                 |                    |                              | 11867.2882        | -0.1                        |
| 3       | 2                | 1                |   | 2   | 1                 | 2                 | 9420.9505          | -1.2                         |                   |                             |
| 4       | 2                | 2                |   | 3   | 1                 | 3                 | 11867.5765         | 1.0                          | 11244.1661        | 0.3                         |
| 5       | 2                | 3                |   | 4   | 1                 | 4                 |                    |                              | 13712.9829        | 1.6                         |
| 3       | 2                | 2                |   | 2   | 1                 | 1                 | 8934.5772          | 0.7                          |                   |                             |
| 4       | 2                | 3                |   | 3   | 1                 | 2                 | 10829.4948         | 0.3                          | 10918.5964        | -1.2                        |
| 5       | 2                | 4                |   | 4   | 1                 | 3                 |                    |                              | 13145.0215        | 0.3                         |
| 3       | 3                | 1                |   | 2   | 2                 | 0                 | 11022.7468         | 0.8                          | 9922.0559         | 1.0                         |
| 4       | 3                | 2                |   | 3   | 2                 | 1                 | 13094.1046         | -0.8                         | 12237.4867        | -1.0                        |
| 3       | 3                | 0                |   | 2   | 2                 | 1                 | 11038.7443         | -1.1                         | 9924.9952         | 0.7                         |
| 4       | 3                | 1                |   | 3   | 2                 | 2                 | 13174.9626         | -0.7                         | 12252.3286        | -1.2                        |
| 11      | 9                | 2                |   | 10  | 8                 | 3                 |                    |                              | 10047.9244        | 1.4                         |
| 12      | 9                | 3                |   | 11  | 8                 | 4                 |                    |                              | 10044.9070        | 1.3                         |
| 13      | 9                | 4                |   | 12  | 8                 | 5                 |                    |                              | 10041.1173        | 3.0                         |
| 14      | 9                | 5                |   | 13  | 8                 | 6                 |                    |                              | 10036.4164        | -4.6                        |
| 4       | 0                | 4                |   | 3   | 1                 | 3                 | 7675.7466          | 0.3                          |                   |                             |
| 5       | 0                | 5                |   | 4   | 1                 | 4                 | 9823.4325          | 0.4                          | 11163.0289        | -1.8                        |
| 6       | 0                | 6                |   | 5   | 1                 | 5                 | 11927.1952         | 0.0                          | 13524.3707        | -1.0                        |
| 5       | 1                | 4                |   | 4   | 2                 | 3                 | 8606.5753          | -0.3                         | 10167.1039        | -0.2                        |
| 6       | 1                | 5                |   | 5   | 2                 | 4                 | 11006.6988         | 0.0                          | 12610.9590        | -0.6                        |
| 6       | 2                | 4                |   | 5   | 3                 | 3                 | 8576.4345          | 0.0                          | 11117.3594        | 0.6                         |
| 7       | 2                | 5                |   | 6   | 3                 | 4                 | 11051.1536         | -0.8                         | 13537.0984        | -1.2                        |
| 6       | 3                | 3                |   | 5   | 4                 | 2                 |                    |                              | 9814.3443         | 0.9                         |

|         |   |    |    |   |    |            |            |      |
|---------|---|----|----|---|----|------------|------------|------|
| 7       | 3 | 4  | 6  | 4 | 3  |            | 12156.4483 | 0.3  |
| 7       | 4 | 3  | 6  | 5 | 2  |            | 10945.9649 | 0.3  |
| 8       | 4 | 4  | 7  | 5 | 3  |            | 13227.7959 | -1.1 |
| 8       | 6 | 2  | 7  | 7 | 1  |            | 10894.9202 | 4.8  |
| 9       | 6 | 3  | 8  | 7 | 2  |            | 13221.5676 | -2.0 |
| 10      | 6 | 5  | 10 | 5 | 6  | 10265.9605 |            | 0.5  |
| 11      | 6 | 6  | 11 | 5 | 7  | 10226.6561 |            | 0.2  |
| 12      | 6 | 7  | 12 | 5 | 8  | 10179.8824 |            | 0.3  |
| c-types |   |    |    |   |    |            |            |      |
| 3       | 1 | 2  | 2  | 0 | 2  | 7670.6820  |            | 1.1  |
| 4       | 1 | 3  | 3  | 0 | 3  | 10074.3087 |            | 0.0  |
| 4       | 2 | 2  | 3  | 1 | 2  | 11043.3012 |            | 0.3  |
| 5       | 2 | 3  | 4  | 1 | 3  | 13128.2254 |            | 0.1  |
| 3       | 2 | 2  | 2  | 1 | 2  | 9347.2279  |            | 0.0  |
| 4       | 2 | 3  | 3  | 1 | 3  | 11653.7700 |            | 0.9  |
| 3       | 3 | 0  | 2  | 2 | 0  | 11023.7700 |            | -2.0 |
| 4       | 3 | 1  | 3  | 2 | 1  | 13101.2391 |            | -0.4 |
| 3       | 3 | 1  | 2  | 2 | 1  | 11037.7213 |            | 2.0  |
| 4       | 3 | 2  | 3  | 2 | 2  | 13167.8296 |            | 0.4  |
| 7       | 0 | 7  | 6  | 1 | 5  | 11181.7455 |            | 0.0  |
| 8       | 0 | 8  | 7  | 1 | 6  | 12360.9606 |            | 0.1  |
| 7       | 1 | 7  | 6  | 2 | 5  | 9747.0534  |            | -1.3 |
| 8       | 1 | 8  | 7  | 2 | 6  | 11217.2498 |            | 1.4  |
| 7       | 2 | 5  | 6  | 3 | 3  | 10968.6913 |            | 0.2  |
| 8       | 2 | 6  | 7  | 3 | 4  | 13392.1149 |            | -0.3 |
| 7       | 2 | 6  | 6  | 3 | 4  | 9640.9176  |            | -0.5 |
| 8       | 2 | 7  | 7  | 3 | 5  | 11498.0450 |            | 0.1  |
| 6       | 6 | 1  | 6  | 5 | 1  | 10348.3078 |            | -1.8 |
| 7       | 6 | 2  | 7  | 5 | 2  | 10336.9126 |            | -1.0 |
| 8       | 6 | 3  | 8  | 5 | 3  | 10319.6089 |            | 0.2  |
| 9       | 6 | 4  | 9  | 5 | 4  | 10294.1767 |            | 0.9  |
| 10      | 6 | 5  | 10 | 5 | 5  | 10257.3890 |            | -1.0 |
| 11      | 6 | 6  | 11 | 5 | 6  | 10204.3173 |            | -0.2 |
| 12      | 6 | 7  | 12 | 5 | 7  | 10127.2570 |            | 0.1  |
| 13      | 6 | 8  | 13 | 5 | 8  | 10014.3781 |            | -1.5 |
| 14      | 6 | 9  | 14 | 5 | 9  | 9848.4528  |            | 0.0  |
| 15      | 6 | 10 | 15 | 5 | 10 | 9606.6497  |            | -0.6 |
| 6       | 6 | 0  | 6  | 5 | 2  | 10348.3440 |            | 1.5  |
| 7       | 6 | 1  | 7  | 5 | 3  | 10337.1090 |            | -1.9 |
| 8       | 6 | 2  | 8  | 5 | 4  | 10320.4614 |            | -0.4 |
| 9       | 6 | 3  | 9  | 5 | 5  | 10297.1463 |            | 0.9  |
| 10      | 6 | 4  | 10 | 5 | 6  | 10266.2175 |            | 1.4  |
| 11      | 6 | 5  | 11 | 5 | 7  | 10227.5176 |            | 1.1  |
| 12      | 6 | 6  | 12 | 5 | 8  | 10182.4249 |            | 0.7  |
| 13      | 6 | 7  | 13 | 5 | 9  | 10134.8843 |            | 0.5  |
| 14      | 6 | 8  | 14 | 5 | 10 | 10092.7006 |            | 3.5  |
| 15      | 6 | 9  | 15 | 5 | 11 | 10068.9828 |            | -2.4 |
| 16      | 6 | 10 | 16 | 5 | 12 | 10083.6851 |            | -0.7 |
| 6       | 0 | 6  | 5  | 1 | 4  | 9892.1192  |            | 0.4  |
| 7       | 0 | 7  | 6  | 1 | 5  | 11181.7450 |            | -0.5 |

|    |   |   |   |   |   |            |      |
|----|---|---|---|---|---|------------|------|
| 9  | 5 | 5 | 8 | 6 | 3 | 8704.5955  | 0.8  |
| 10 | 5 | 6 | 9 | 6 | 4 | 10860.7858 | -0.6 |
| 9  | 5 | 4 | 8 | 6 | 2 | 8707.5955  | 0.1  |
| 10 | 5 | 5 | 9 | 6 | 3 | 10869.2914 | -0.4 |
